# Supplementary material for: “Same Same or Adapted?” Therapists’ Feedback on the Implementation of Trauma-Focused Cognitive Behavioral Therapy With Unaccompanied Young Refugees
Source: PubMed Central journal article supplement (PMC9670829; doi:10.32872/cpe.5431), 2021-11-23
Supplement: cpe-03-5431-s01.pdf [file cpe-03-5431-s01.pdf]

## **Supplementary material**

“Same same or adapted?” Therapists’ feedback on the implementation of trauma-focused  
cognitive behavioral therapy with unaccompanied young refugees

Unterhitzberger, J., Haberstumpf, S., Rosner, R., & Pfeiffer, E.

Manuscript published in *Clinical Psychology in Europe*

<https://doi.org/10.32872/cpe.5431>

**Table A***Examples from the Coding Manual on Additional Techniques*

| <b>Category</b>          | <b>Content</b>                                                                                                                                                                                            | <b>Example</b>                                                                                                  |
|--------------------------|-----------------------------------------------------------------------------------------------------------------------------------------------------------------------------------------------------------|-----------------------------------------------------------------------------------------------------------------|
| Crisis of the week       | Mention of conflicts arising from the flight situation or the asylum process, discussion of recent incidents, recent problems (e.g. in school, training), current mood                                    | “Patient is in conflict between right to care for himself and his family’s hardships in his home country” (T 2) |
| Psychoeducation          | Mention of any psychoeducational content on TF-CBT components, psychotherapy, on PTSD or comorbid symptoms, or on interventional techniques regarding those outside of the regular psychoeducation module | “Psychoeducation on fight-flight-freeze reactions” (T 4)                                                        |
| Cognitive processing     | Repetition of cognitive processing component or mention of any techniques that involve working with cognitions outside of the regular cognitive processing module                                         | “Description of thought stopping technique” (T 6)                                                               |
| Trauma narrative         | Repetition of trauma narrative component or mention of any content or techniques that involve the trauma narrative or working with it outside of the regular cognitive processing module                  | “Identification of the worst moment” (T 2)                                                                      |
| Other additional content | Mention of comprehensive content or techniques, feedback on therapy,                                                                                                                                      | “Talk on if and how the patient would recommend therapy”                                                        |

*Note.* PTSD = Posttraumatic stress disorder; TF-CBT = Trauma-focused cognitive behavioral therapy; T = Therapist

**Table B**

*Examples from the Coding Manual on Obstacles Regarding TF-CBT*

| <b>Category</b>                             | <b>Content</b>                                                                              | <b>Example</b>                                                                                                                                                                     |
|---------------------------------------------|---------------------------------------------------------------------------------------------|------------------------------------------------------------------------------------------------------------------------------------------------------------------------------------|
| Relaxation                                  | Mention of relaxation component or any technique that involves relaxation                   | “The patient boycotted relaxation techniques” (T 6)                                                                                                                                |
| TF-CBT components ahead of trauma narrative | Mention of any content that describes period of time until trauma confrontation as too long | “Long duration of treatment until the trauma narrative: this enhanced avoidance in the patient and I would have preferred to do without relaxation and affective modulation” (T 4) |
| Linguistic problems                         | Mention of any linguistic problems                                                          | “Cognitive restructuring was almost impossible because of linguistic problems – despite the presence of an interpreter” (T 6)                                                      |

*Note.* TF-CBT = Trauma-focused cognitive behavioral therapy; T = Therapist

**Table C***Examples from the Coding Manual for Cultural Considerations*

| <b>Category</b>               | <b>Content</b>                                                                        | <b>Example</b>                                                                                |
|-------------------------------|---------------------------------------------------------------------------------------|-----------------------------------------------------------------------------------------------|
| Pride                         | Mention of pride from the patient's perspective                                       | "The concept of lost pride due to sexual violence was new to me and needed discussion." (T 1) |
| Religion                      | Mention of any content involving religion or faith                                    | "Religious rituals as a resource" (T 8)                                                       |
| Metaphors and proverbs        | Mention of any metaphors or proverbs supplied by the patient                          | "Metaphors and proverbs that are now established in my work" (T 7)                            |
| Mental and somatic complaints | Mention of any attitudes, coping or experiences with mental and/or somatic complaints | "Attitudes towards mental illness and coping with somatic complaints" (T 6)                   |

---

*Note.* T = Therapist
